# Supplementary material for: New mitochondrial genome resource for resolving the grey langur species complex
Source: Research Square preprint supplement (doi:10.21203/rs.3.rs-282571/v1), 2021-08-13
Supplement: Supplementary file 1 [file 85ca27f1dc43a2821b259f3e.docx]

| Name of gene | Start Nucleotide  position | End Nucleotide position | Strand  (+ve/-ve) | Length (bp) | Anticodon | Intergenic nucleotides |
| --- | --- | --- | --- | --- | --- | --- |
| tRNA-Phe | 1 | 71 | + | 71 | GAA | 0 |
| rRNA S | 72 | 1018 | + | 947 | - | 0 |
| tRNA-Val | 1019 | 1087 | + | 69 | UAC | 0 |
| rRNA L | 1088 | 2661 | + | 1574 | - | 0 |
| tRNA-Leu2 | 2662 | 2736 | + | 75 | UAA | 2 |
| ND1 | 2739 | 3695 | + | 957 | - | -2 |
| tRNA-Ile | 3694 | 3763 | + | 70 | GAU | -3 |
| tRNA-Gln | 3761 | 3832 | - | 72 | UUG | 0 |
| tRNA-Met | 3833 | 3901 | + | 69 | CAU | 4 |
| ND2 | 3906 | 4955 | + | 1050 | - | -10 |
| tRNA-Trp | 4946 | 5014 | + | 69 | UCA | 8 |
| tRNA-Ala | 5023 | 5091 | - | 69 | UGC | 1 |
| tRNA-Asn | 5093 | 5165 | - | 73 | GUU | 2 |
| OL | 5168 | 5199 | + | 32 | - | -1 |
| tRNA-Cys | 5199 | 5266 | - | 68 | GCA | -1 |
| tRNA-Tyr | 5266 | 5331 | - | 66 | GUA | 11 |
| COI | 5343 | 6887 | + | 1545 | - | -3 |
| tRNA-Ser2 | 6885 | 6953 | - | 69 | UGA | 3 |
| tRNA-Asp | 6957 | 7024 | + | 68 | GUC | 1 |
| COII | 7026 | 7709 | + | 684 | - | 48 |
| tRNA-Lys | 7758 | 7824 | + | 67 | UUU | 1 |
| ATP8 | 7826 | 8032 | + | 207 | - | -46 |
| ATP6 | 7987 | 8667 | + | 681 | - | -1 |
| COIII | 8667 | 9451 | + | 785 | - | -1 |
| tRNA-Gly | 9451 | 9518 | + | 68 | UCC | -3 |
| ND3 | 9516 | 9864 | + | 349 | - | 0 |
| tRNA-Arg | 9865 | 9929 | + | 65 | UCG | 0 |
| ND4l | 9930 | 10226 | + | 297 | - | -7 |
| ND4 | 10220 | 11597 | + | 1378 | - | 0 |
| tRNA-His | 11598 | 11666 | + | 69 | GUG | 0 |
| tRNA-Ser1 | 11667 | 11725 | + | 59 | GCU | 0 |
| tRNA-Leu1 | 11726 | 11795 | + | 70 | UAG | 5 |
| ND5 | 11801 | 13606 | + | 1806 | - | 0 |
| ND6 | 13607 | 14128 | - | 522 | - | 0 |
| tRNA-Glu | 14129 | 14197 | - | 69 | UUC | 4 |
| CytB | 14202 | 15342 | + | 1141 | - | 0 |
| tRNA-Thr | 15343 | 15408 | + | 66 | UGU | 2 |
| tRNA-Pro | 15411 | 15477 | - | 67 | UGG | 383 |
| OH | 15861 | 16102 | + | 242 | - | 461 |
| D-loop | 15478 | 16563 | + | 1085 | - | - |

**Table 1.** Mitochondrial genome organization of *S. hypoleucos*
