# Supplementary material for: New mitochondrial genome resource for resolving the grey langur species complex
Source: Research Square preprint supplement (doi:10.21203/rs.3.rs-282571/v1), 2021-08-13
Supplement: Supplementary file 2 [file a5f8a8348b23efb81e34f683.docx]

**Table 5.** Pairwise comparison of genetic distance between *S. hypoleucos* and other Primates species

| Pairwise Comparison of…. | Pairwise comparison with….. | Percent Genetic distance | | | |
| --- | --- | --- | --- | --- | --- |
| COI gene | CYTB gene | Concatenated Assembly of 13 PCGs | Complete mitochondrial genome |
| A. HANUMAN LANGUR SPECIES COMPLEX | |  | |  |  |
| 1. *Trachypithecus johnii* | *Semnopithecus hypoleucos* | 3.57 | 5.57 | 5.94 | 5.40 |
| 1. *Semnopithecus entellus* | 5.19 | 8.22 | 7.25 | 6.55 |
| 1. *Trachypithecus vetulus* | 6.43 | 9.28 | 8.27 | 7.61 |
| B. OTHER LANGURS AND OLD WORLD MONKEYS | | | | | |
| 1. *Trachypithecus hatinhensis* | *Semnopithecus hypoleucos* | 12.86 | 16.96 | 14.83 | 13.54 |
| 1. *Trachypithecus germaini* | 12.66 | 15.81 | 14.95 | 13.69 |
| 1. *Trachypithecus francoisi* | 13.18 | 16.17 | 15.44 | 14.05 |
| 1. *Trachypithecus shortridgei* | 12.21 | 16.52 | 14.73 | 13.47 |
| 1. *Trachypithecus pileatus* | 12.27 | 16.25 | 14.81 | 13.51 |
| 1. *Trachypithecus obscurus* | 12.73 | 15.28 | 14.91 | 13.63 |
| 1. *Trachypithecus cristatus* | 13.05 | 15.99 | 14.67 | 13.45 |
| 1. *Presbytis melalophos* | 12.99 | 17.93 | 15.54 | 14.15 |
| 1. *Procolobus badius* | 14.87 | 16.52 | 16.88 | 15.39 |
| 1. *Colobus guereza* | 15.84 | 18.55 | 17.05 | 15.59 |
| 1. *Pygathrix roxellana* | 13.25 | 15.90 | 15.22 | 13.85 |
| 1. *Pygathrix nemaeus* | 14.55 | 16.78 | 15.89 | 14.34 |
| 1. *Nasalis larvatus* | 12.79 | 15.46 | 14.92 | 13.61 |
| C. OTHER PRIMATE SPECIES | | | | | |
| 1. *Pongo pygmaeus* | *Semnopithecus hypoleucos* | 19.81 | 22.08 | 23.28 | 21.77 |
| 1. *Papio hamadryas* | 17.99 | 19.96 | 19.93 | 18.37 |
| 1. *Gorilla gorilla* | 18.64 | 21.29 | 22.53 | 21.08 |
| 1. *Pan troglodytes* | 18.77 | 22.17 | 22.45 | 20.80 |
| 1. *Pan paniscus* | 18.77 | 22.53 | 22.24 | 20.66 |
| 1. *Cebus albifrons* | 19.29 | 26.15 | 27.19 | 25.17 |
| 1. *Hylobates lar* | 19.42 | 23.94 | 22.99 | 21.40 |
| 1. *Pongo abelii* | 19.74 | 22.44 | 23.30 | 21.65 |
| 1. *Pongo pygmaeus* | 19.81 | 22.08 | 23.28 | 21.77 |
